# Supplementary material for: A lateral flow strip for on-site detection of tobramycin based on dual-functional platinum-decorated gold nanoparticles
Source: Royal Society of Chemistry journal article supplement (doi:10.1039/d1an00403d), 2021-01-01
Supplement: d1an00403d1.pdf [file d1an00403d1.pdf]

*Electronic Supplementary Information*

**Lateral flow strip for on-site detection of tobramycin based  
on dual-functional platinum-decorated gold nanoparticles**

Xin Jin, Luo Chen, Yuting Zhang, Xiaoli Wang, Nandi Zhou\*

The Key Laboratory of Carbohydrate Chemistry and Biotechnology, Ministry of  
Education, School of Biotechnology, Jiangnan University, Wuxi 214122, China

\*Corresponding author. Tel: +86-510-85197831; Fax: +86-510-85197831; E-mail:

zhounandi@jiangnan.edu.cn

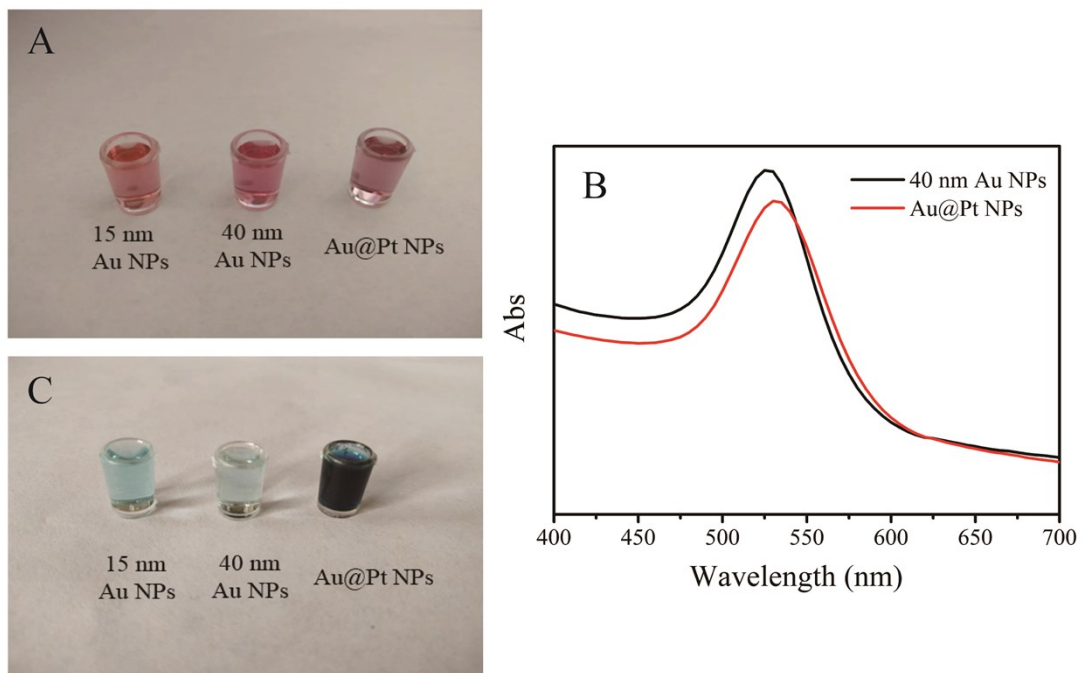

**Fig. S1** Plasma and catalytic properties of AuNPs seeds and Au@Pt NPs. (A) Photo of different NPs in aqueous solution; (B) UV-Vis spectrum of Au@Pt NPs; (C) Photo after the catalytic reaction of different NPs.

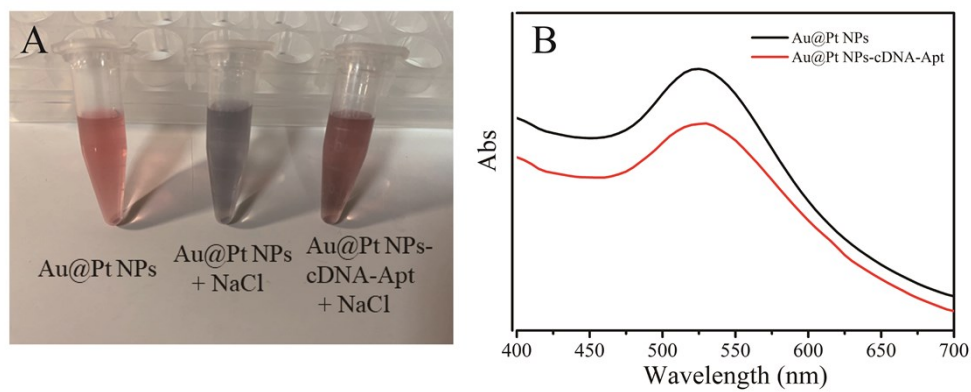

**Fig. S2** Characterization of the Au@Pt NPs conjugates. (A) The color of Au@Pt NPs in NaCl before and after functional modification; (B) UV-Vis adsorption spectra of Au@Pt NPs and Au@Pt NPs-cDNA-Apt.
